# Supplementary material
Source: publisher site journal article supplement (https://www.degruyterbrill.com/publication/isbn/9781614510864/downloadAsset/9781614510864_Contents.pdf)
Supplement: Supplementary file 1 [file 9781614510864_Contents.pdf]

# Contents

|                                                                                             |     |
|---------------------------------------------------------------------------------------------|-----|
| Acknowledgements                                                                            | vii |
| Chapter 1                                                                                   |     |
| Introduction                                                                                | 1   |
| 1. Motivation for the study                                                                 | 1   |
| 1.1. Theories of word learning                                                              | 2   |
| 2. The study                                                                                | 9   |
| 2.1. The children                                                                           | 9   |
| 2.2. Communicative abilities of the children                                                | 10  |
| 3. Outline of monograph                                                                     | 11  |
| <br>Chapter 2                                                                               |     |
| What is autism?                                                                             | 13  |
| 1. The emergence of autism as a syndrome                                                    | 13  |
| 2. Autism: The current perspective                                                          | 18  |
| 2.1. Autism and behaviour                                                                   | 19  |
| 2.2. Autism and aetiology                                                                   | 23  |
| 2.3. Autism and cognitive abilities                                                         | 25  |
| 2.4. Autism and language                                                                    | 34  |
| 3. Diagnosis and assessment                                                                 | 39  |
| 4. Conclusion                                                                               | 42  |
| <br>Chapter 3                                                                               |     |
| Understanding actions, states and events: Verb learning in children in children with autism | 44  |
| 1. Introduction                                                                             | 44  |
| 2. Preliminaries                                                                            | 45  |
| 2.1. The study                                                                              | 45  |
| 2.2. Semantic categories                                                                    | 46  |
| 3. Semantic profiles by category                                                            | 47  |
| 3.1. Activity                                                                               | 47  |
| 3.2. Change of state                                                                        | 51  |
| 3.3. Stative                                                                                | 53  |
| 3.4. Deictic                                                                                | 56  |

|                                                 |    |
|-------------------------------------------------|----|
| 3.5. Desire                                     | 58 |
| 3.6. Emotion                                    | 61 |
| 3.7. Perception                                 | 64 |
| 3.8. Communication                              | 67 |
| 3.9. Mental state                               | 69 |
| 3.10. Causative                                 | 72 |
| 3.11. Abstract                                  | 75 |
| 3.12. Modal auxiliaries                         | 78 |
| 3.13. Misuses                                   | 81 |
| 3.14. Lexical innovations                       | 83 |
| 4. Overview                                     | 84 |
| 4.1. Semantic profile of verb use               | 84 |
| 4.2. The developmental path of verb acquisition | 85 |
| 4.3. Lexical diversity                          | 88 |
| 5. Conclusion                                   | 91 |

#### Chapter 4

|                                                                                               |     |
|-----------------------------------------------------------------------------------------------|-----|
| Understanding space and time: Preposition learning in children with autism                    | 93  |
| 1. Introduction                                                                               | 93  |
| 2. Theoretical background                                                                     | 94  |
| 3. Semantic profiles by category                                                              | 95  |
| 3.1. Spatial                                                                                  | 95  |
| 3.2. Temporal                                                                                 | 100 |
| 3.3. Abstract                                                                                 | 102 |
| 3.4. Grammatical                                                                              | 105 |
| 3.5. Misuses                                                                                  | 107 |
| 4. Detailed examination of the prepositions <i>in</i> , <i>on</i> , <i>up</i> , and <i>at</i> | 109 |
| 4.1. <i>In</i>                                                                                | 109 |
| 4.2. <i>On</i>                                                                                | 114 |
| 4.3. <i>Up</i>                                                                                | 118 |
| 4.4. <i>At</i>                                                                                | 121 |
| 5. Overview: Developmental flowchart                                                          | 126 |
| 6. Conclusion                                                                                 | 129 |

#### Chapter 5

|                                                                 |     |
|-----------------------------------------------------------------|-----|
| Verbs of thought, desire, and speech in grammatical development | 130 |
| 1. Introduction                                                 | 130 |

|                                                                           |     |
|---------------------------------------------------------------------------|-----|
| 2. Verbs of desire                                                        | 131 |
| 3. Verbs of cognition                                                     | 135 |
| 4. Verbs of communication                                                 | 138 |
| 5. Summary                                                                | 142 |
| 6. Theory of mind and complex clauses                                     | 143 |
| 6.1. Theory of mind development                                           | 143 |
| 6.2. Syntactic complements and theory of mind development                 | 147 |
| 6.3. Verbs of communication and theory of mind development                | 150 |
| 6.4. Complex sentences and theories of language acquisition               | 152 |
| 7. Conclusion                                                             | 160 |
| <br>Chapter 6                                                             |     |
| Issues and implications                                                   | 161 |
| 1. Overview of study                                                      | 161 |
| 2. Semantic development                                                   | 163 |
| 3. The effect of autism on the interrelatedness of verbs and prepositions | 172 |
| 4. Theory of mind and complementation                                     | 175 |
| 5. The origin of grammar: A perspective from autism                       | 177 |
| 6. Final comments                                                         | 182 |
| <br>Notes                                                                 | 185 |
| References                                                                | 186 |
| Index                                                                     | 222 |
